# Supplementary figures and images for: Price equation captures the role of drug interactions and collateral effects in the evolution of multidrug resistance
Source: eLife journal article supplement (doi:10.7554/elife.64851), 2021-07-21

Collateral Effects

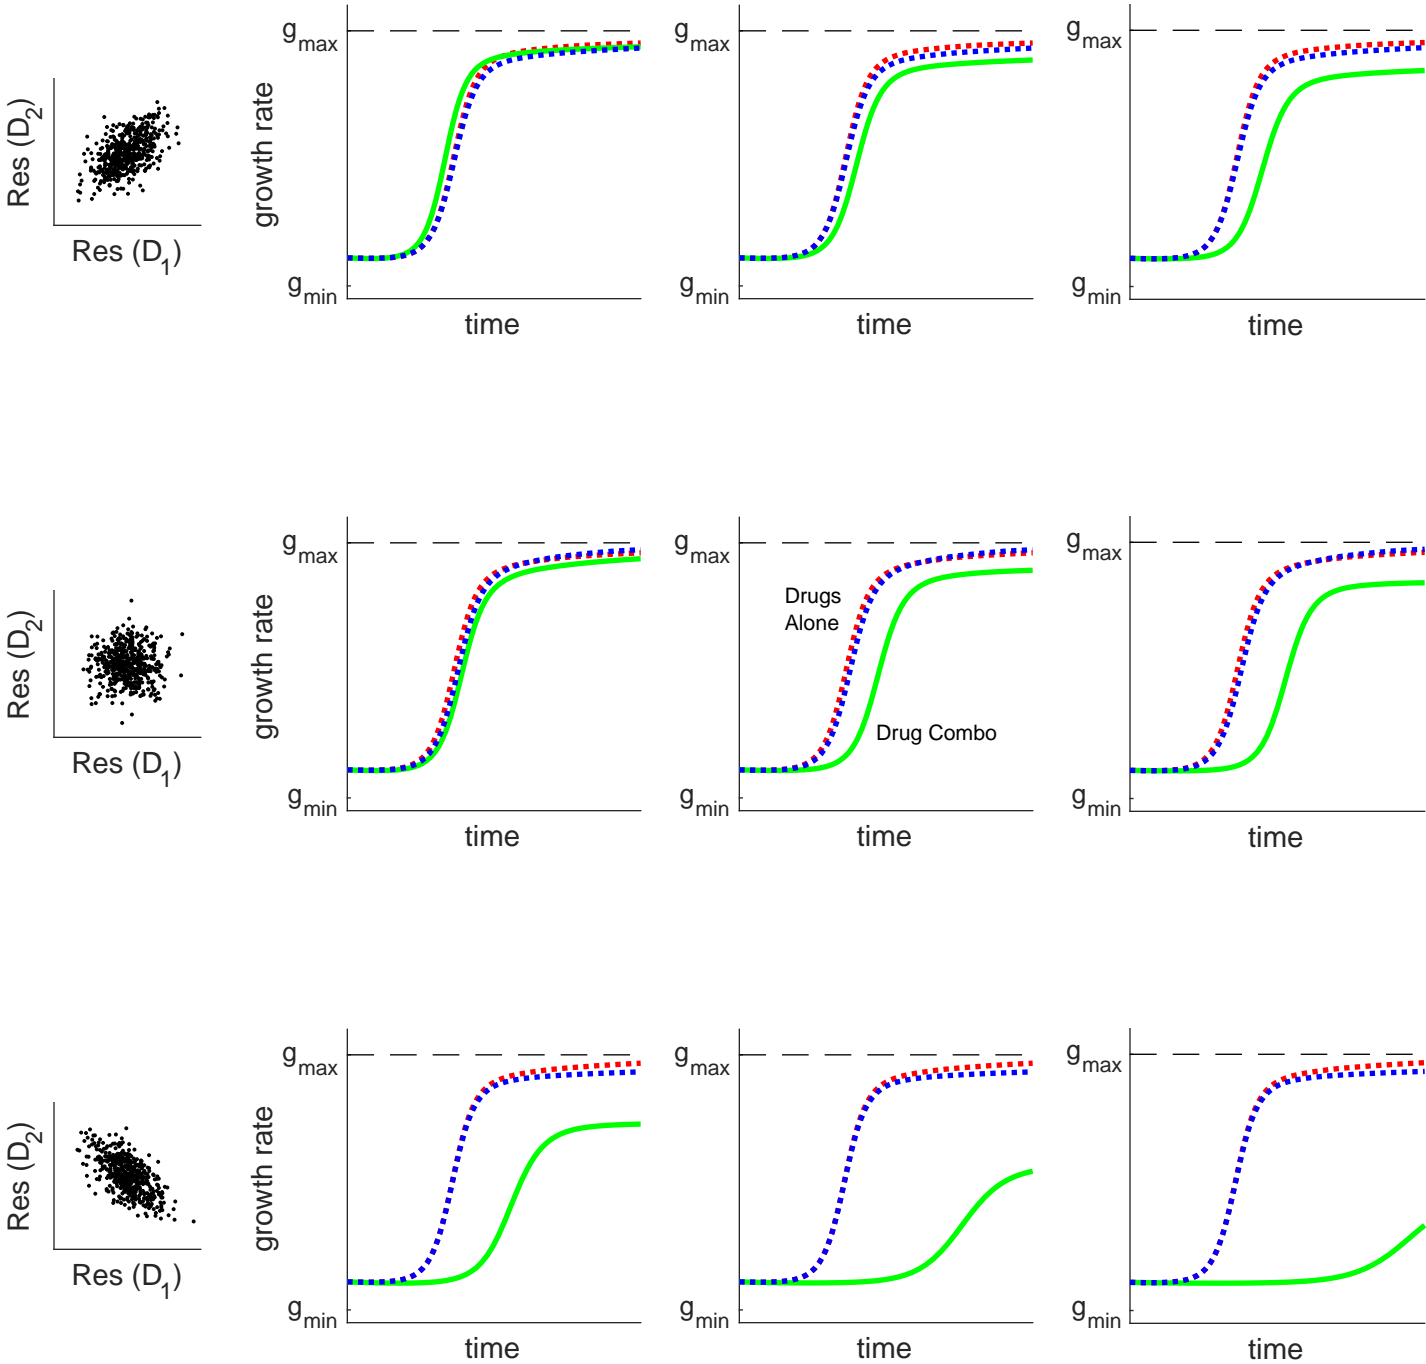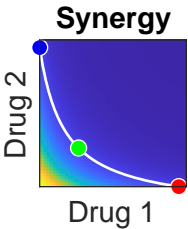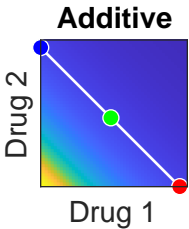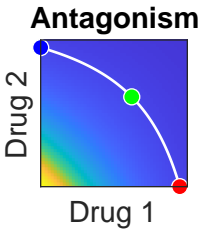

Drug Interaction

Supplement: supp [file elife-64851-supp-v2.zip]

A

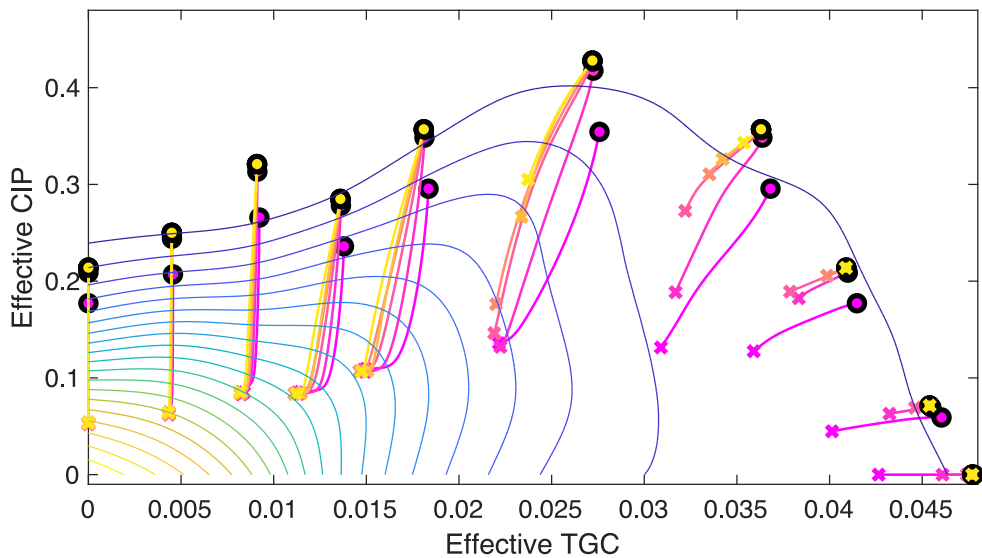

B

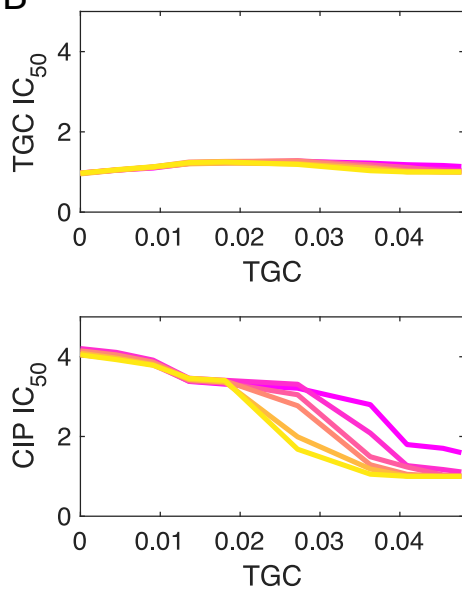

C

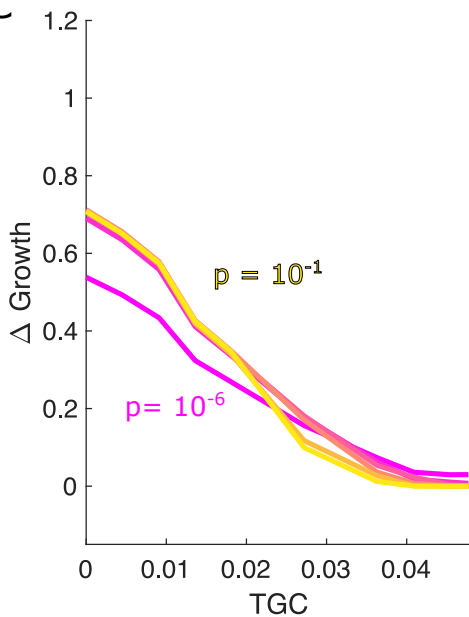

Supplement: supp [file elife-64851-supp-v2.zip]

A

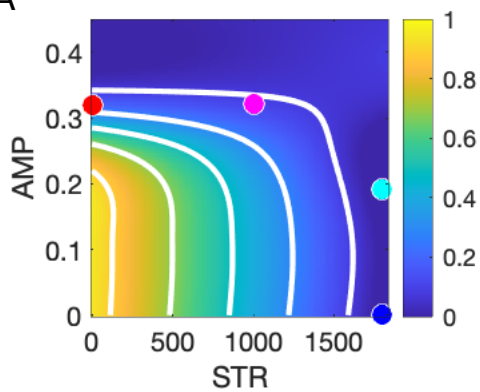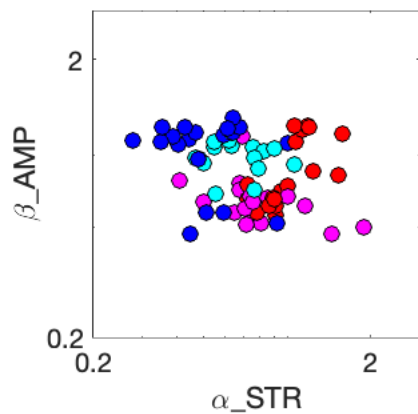

B

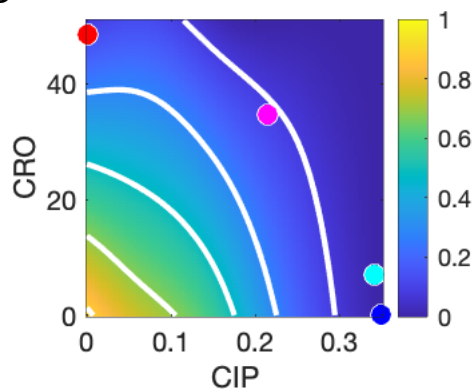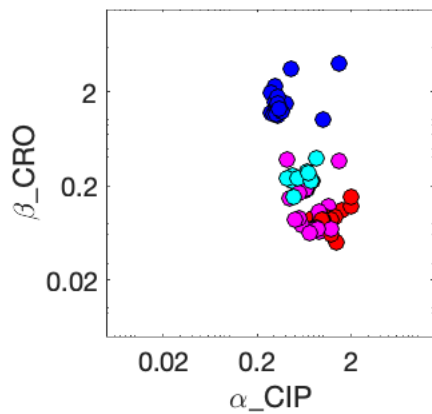

C

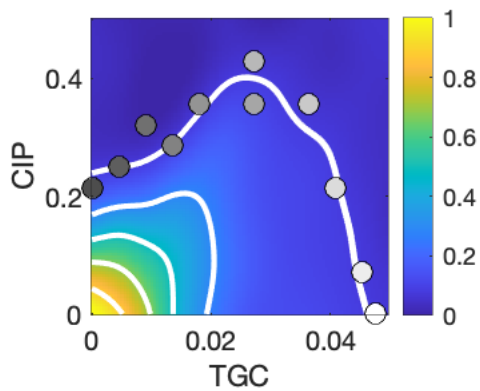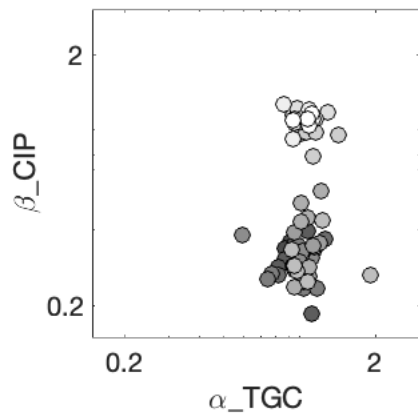

Supplement: supp [file elife-64851-supp-v2.zip]

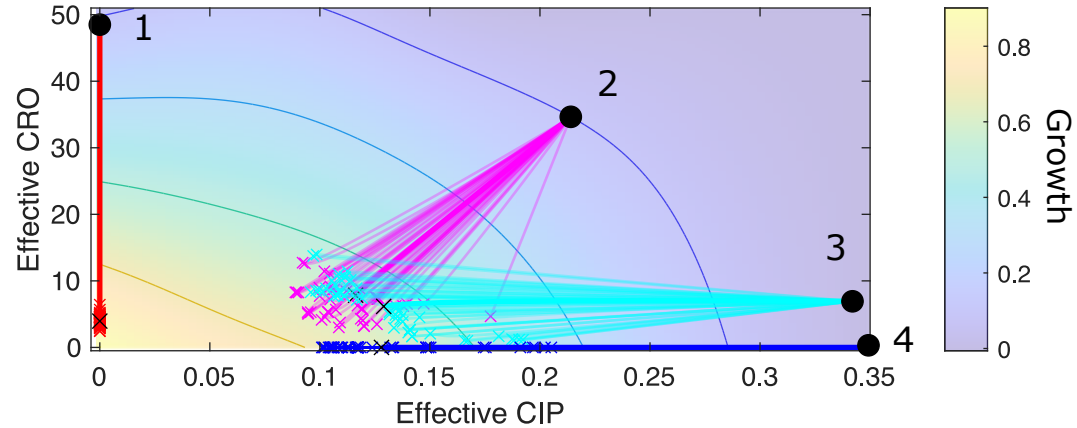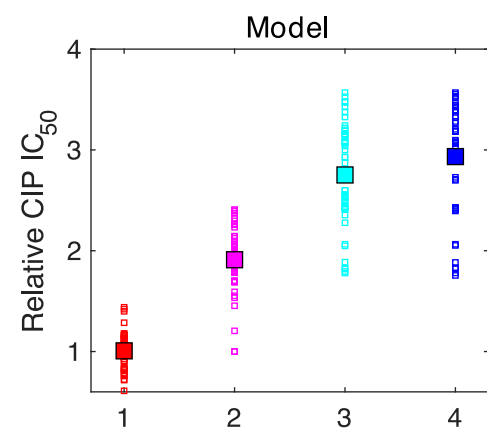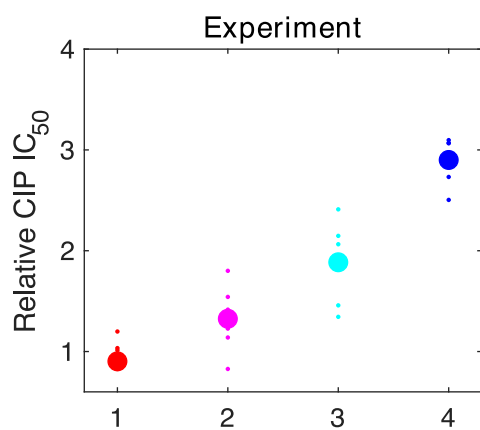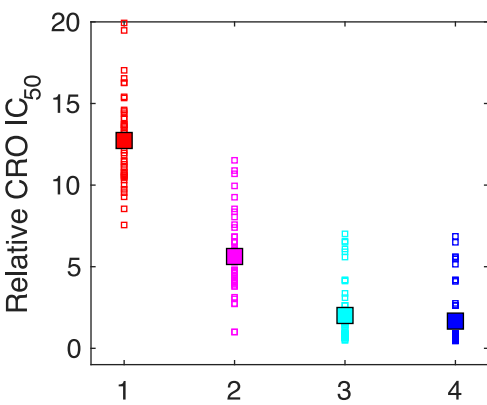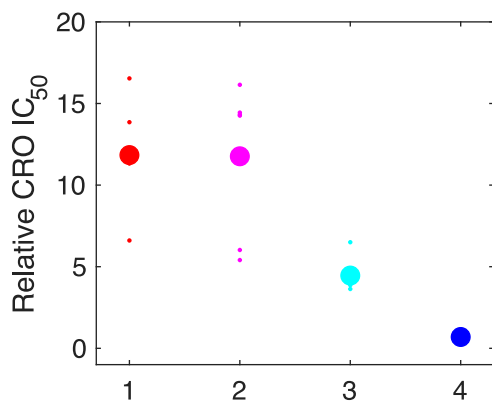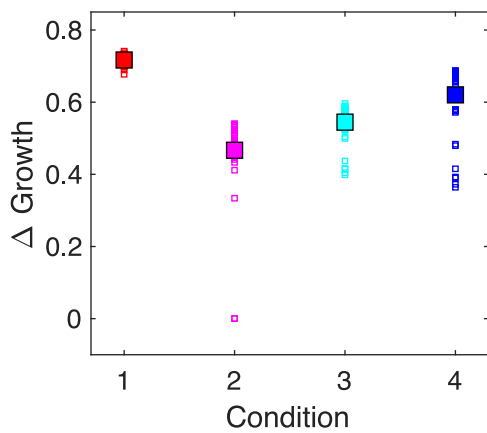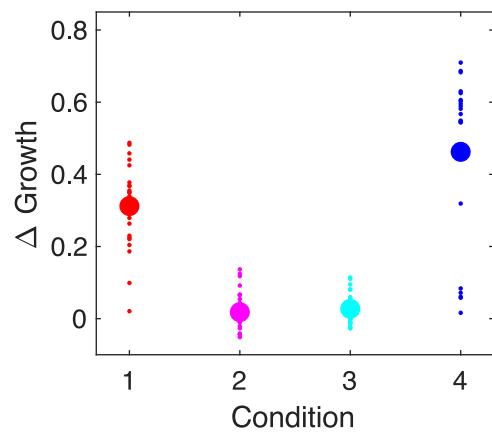

Supplement: supp [file elife-64851-supp-v2.zip]

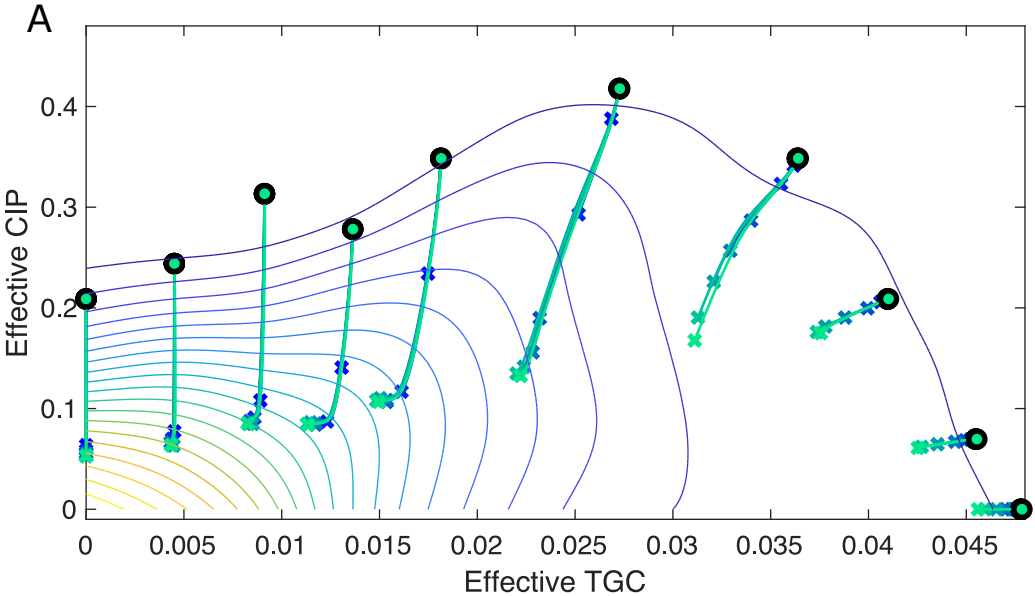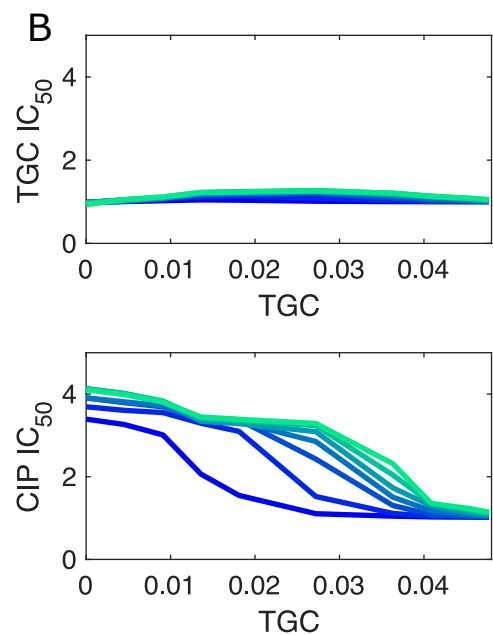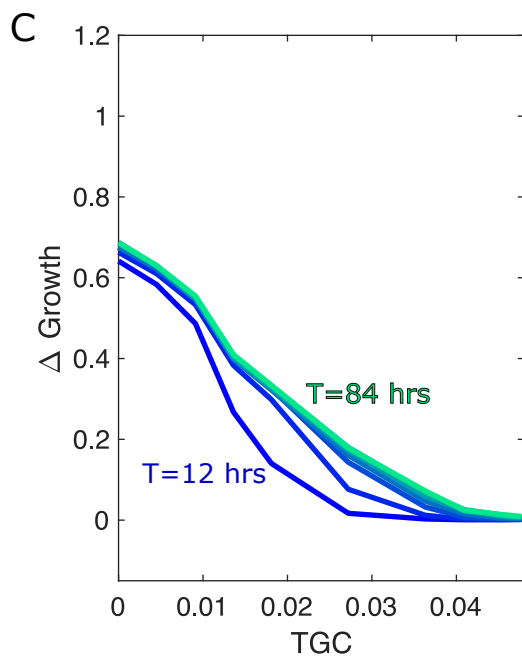

Supplement: supp [file elife-64851-supp-v2.zip]

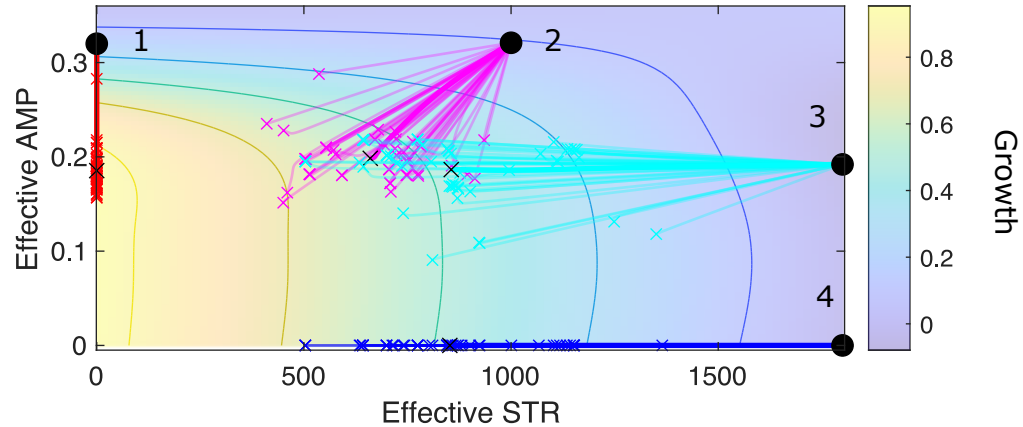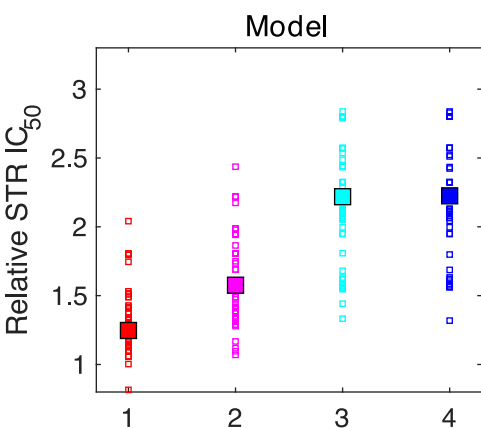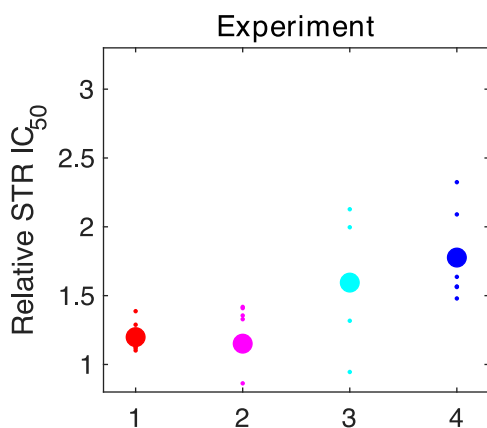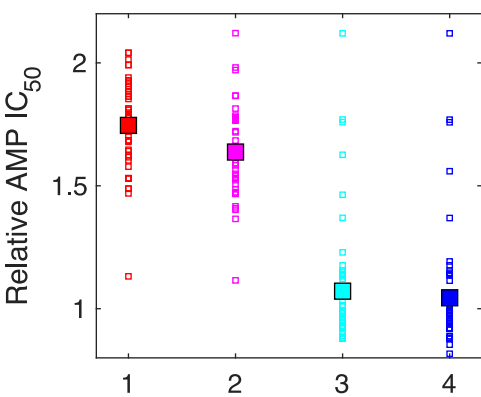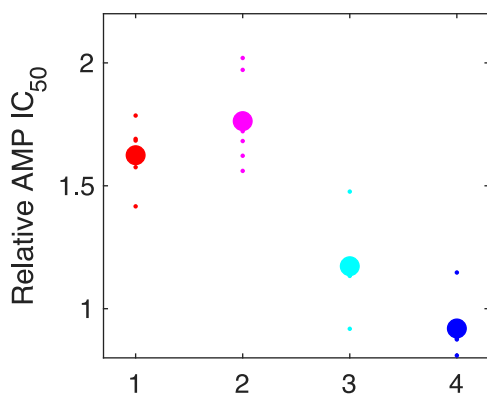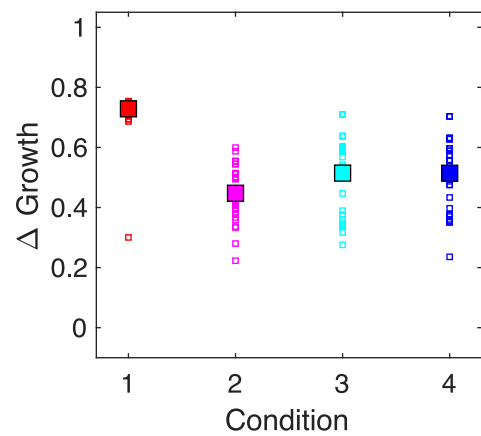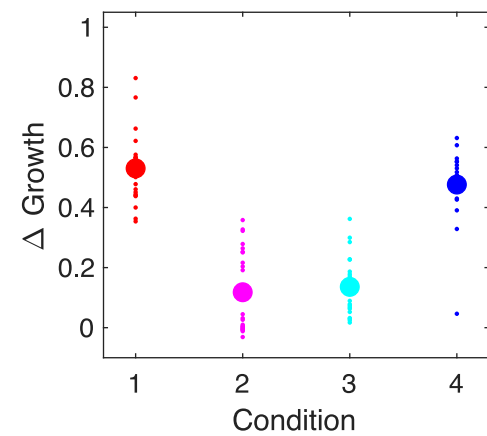

Supplement: supp [file elife-64851-supp-v2.zip]

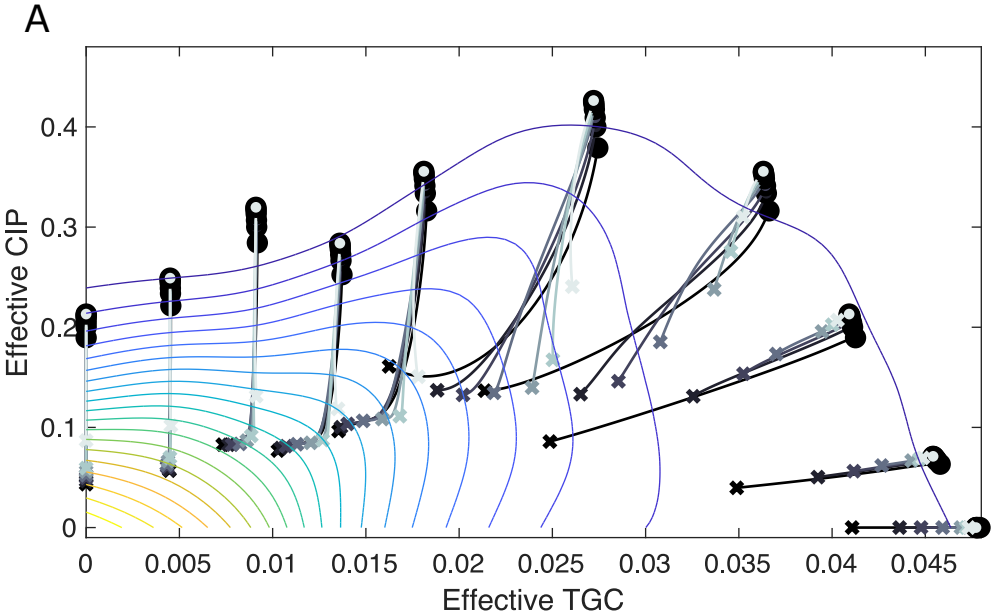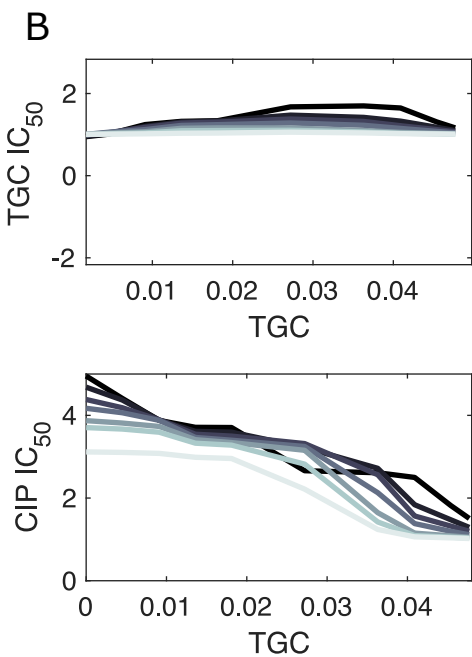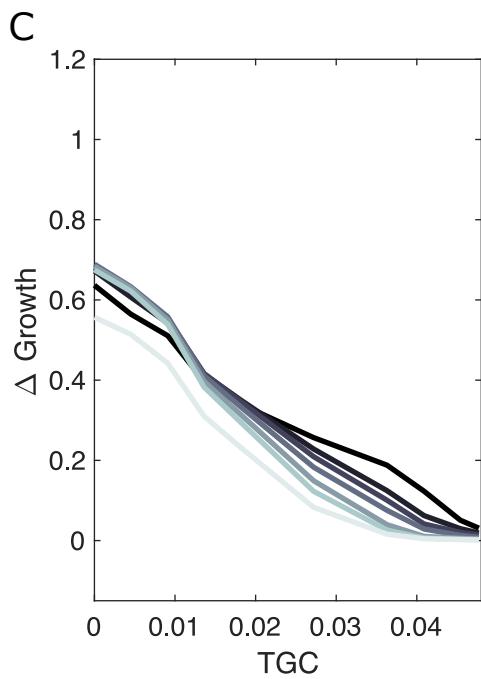

Supplement: supp [file elife-64851-supp-v2.zip]

### Additive

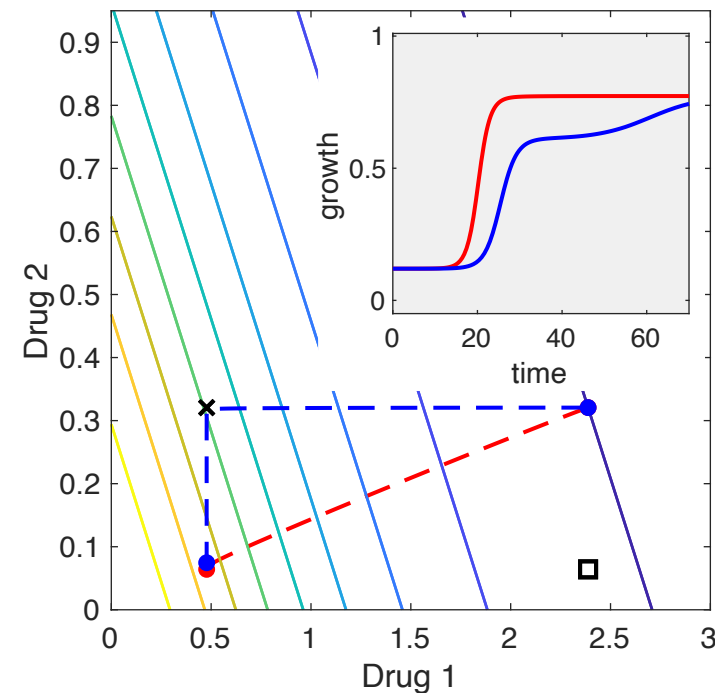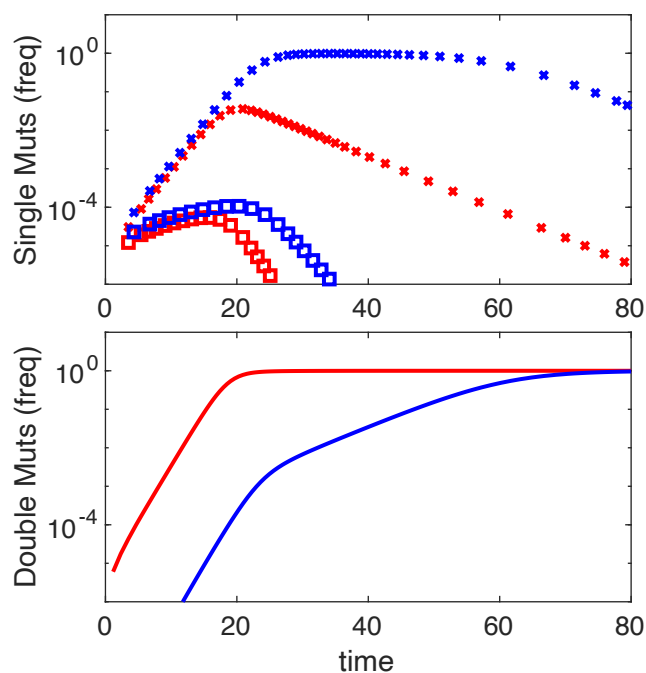

### Synergy

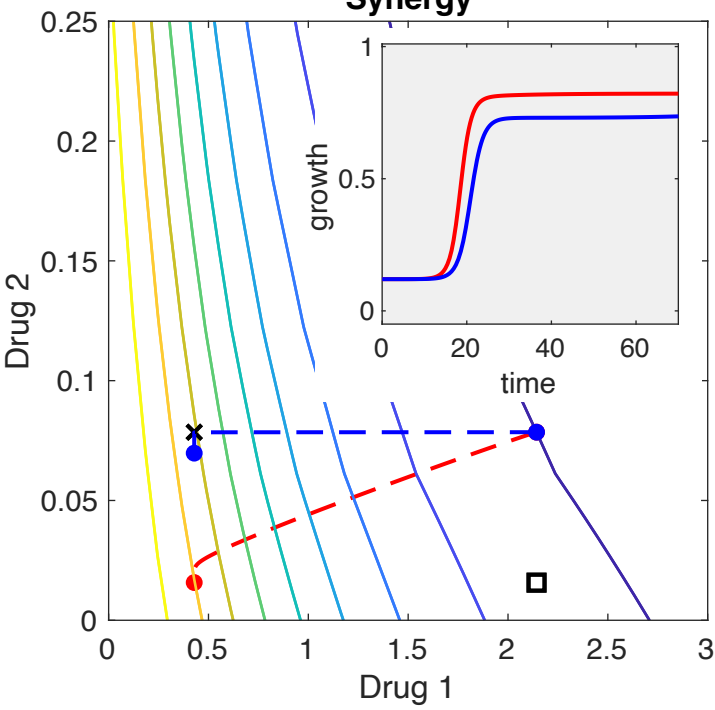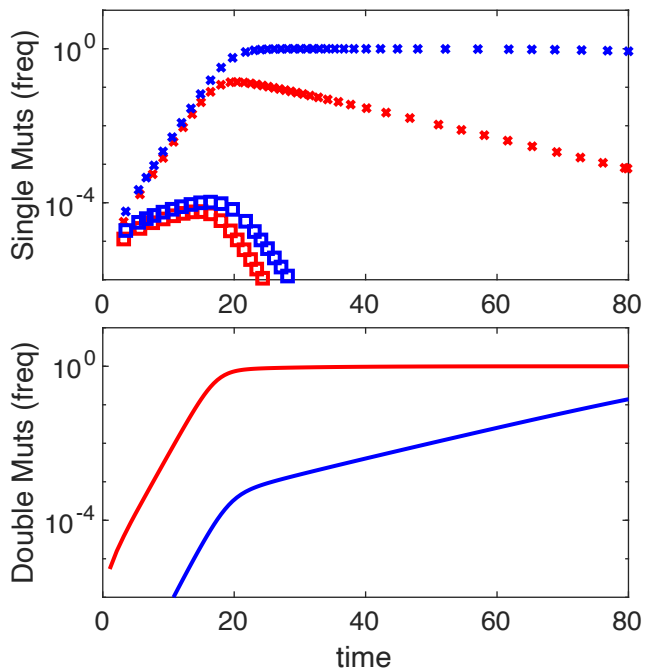

Supplement: supp [file elife-64851-supp-v2.zip]
